# Supplementary material for: The Role of QRS Complex and ST-Segment in Major Adverse Cardiovascular Events Prediction: A 6-Year Follow-Up Study
Source: Preprints.org preprint supplement (doi:10.20944/preprints202402.1723.v1), 2024-02-29
Supplement: Supplementary file 1 [file supplementary]

**Table S1.** Culprit vessel and treatment data

| **Variables** | **Whole sample (N = 200)** | **Symptoms duration of less than 6 hours (N = 100)** | **Symptoms duration of more than 6 hours (N = 100)** | **P value** |
| --- | --- | --- | --- | --- |
| **MI localization** |  |  |  |  |
| **Wide-anterior** | 26 (13%) | 8 | 18 | 0,058 |
| **Anteroseptal** | 26 (13%) | 9 | 17 | 0,141 |
| **Anterolateral** | 15 (8%) | 7 | 8 | 1,000 |
| **Anteroseptoapical** | 10 (5%) | 4 | 6 | 0,746 |
| **Lateral** | 4 (2%) | 1 | 3 | 0,614 |
| **Inferior** | 60 (30%) | 31 | 29 | 0,877 |
| **Posterior-Inferior** | 39 (20%) | 29 | 10 | **0,001** |
| **Posterior-inferior-lateral** | 18 (9%) | 9 | 9 | 1,000 |
| **Circular** | 2 (1%) | 2 | 0 | 0,477 |
| **PCI/CABG arteries** |  |  |  |  |
| **LAD** | 57 (29%) | 21 | 36 | **0,028** |
| **LAD+RCA** | 22 (11%) | 13 | 9 | 0,498 |
| **LAD+RCX** | 6 (3%) | 4 | 2 | 0,678 |
| **LAD+OM1** | 1 (1%) | 0 | 1 | 1,000 |
| **LAD+OM2** | 1 (1%) | 0 | 1 | 1,000 |
| **LAD+D1** | 1 (1%) | 1 | 0 | 1,000 |
| **LAD+RIM** | 1 (1%) | 1 | 0 | 1,000 |
| **RCA** | 69 (35%) | 43 | 26 | **0,017** |
| **D1** | 2 (1%) | 1 | 1 | 1,000 |
| **D1+RCA** | 1 (1%) | 0 | 1 | 1,000 |
| **RCX+RCA** | 6 (3%) | 4 | 2 | 0,678 |
| **RIA+RCX+RCA** | 12 (6%) | 7 | 5 | 0,766 |
| **OM1** | 6 (3%) | 1 | 5 | 0,214 |
| **OM2** | 4 (2%) | 1 | 3 | 0,614 |
| **RCX** | 7 (4%) | 3 | 4 | 1,000 |
| **PD** | 1 (1%) | 0 | 1 | 1,000 |
| **RPL** | 1 (1%) | 0 | 1 | 1,000 |
| **OM2+RCA** | 1 (1%) | 0 | 1 | 1,000 |
| **RCA+RPL** | 1 (1%) | 0 | 1 | 1,000 |
| **Infarct-Related Artery (IRA)** |  |  |  |  |
| **RCA** | 99 (50%) | 63 | 36 | **0,000** |
| **LAD** | 75 (38%) | 28 | 47 | **0,009** |
| **D1** | 3 (2%) | 1 | 2 | 1,000 |
| **PD** | 2 (1%) | 0 | 2 | 0,477 |
| **OM1** | 6 (3%) | 1 | 5 | 0,214 |
| **RCX** | 10 (5%) | 6 | 4 | 0,746 |
| **OM2** | 4 (2%) | 1 | 3 | 0,614 |
| **RPL** | 1 (1%) | 0 | 1 | 1,000 |
| **Arterial segment** |  |  |  |  |
| **Proximal** | 77 (39%) | 36 | 41 | 0,561 |
| **Medial** | 97 (49%) | 46 | 51 | 0,571 |
| **Distal** | 26 (13%) | 18 | 8 | 0,058 |
| **Degree of stenosis - IRA** | 99,29 | 100.0 [100.0 - 100.0] | 100.0 [100.0 - 100.0] | 0,105 |
| **Cardiac dominance** |  |  |  |  |
| **Right coronary artery** | 181 (91%) | 88 | 93 | 0,335 |
| **Circumflex artery** | 12 (6%) | 8 | 4 | 0,372 |
| **Both** | 7 (4%) | 4 | 3 | 1,000 |
| **Door-to-balloon time (min)** | 47.2 | 42.0 [31.5 - 54.25] | 40.5 [34.75 - 55.0] | 0,672 |
| **Predilatation** | 153 (77%) | 73 | 80 | 0,317 |
| **Direct implantation** | 31 (16%) | 15 | 16 | 1,000 |
| **Thromboaspiration** | 33 (17%) | 23 | 10 | **0,022** |
| **Stented arteries** |  |  |  |  |
| **LAD** | 64 (32%) | 24 | 40 | **0,023** |
| **LAD+RCA** | 15 (8%) | 8 | 7 | 1,000 |
| **LAD+RCX** | 4 (2%) | 2 | 2 | 1,000 |
| **LAD+OM1** | 1 (1%) | 0 | 1 | 1,000 |
| **LAD+RIM** | 1 (1%) | 1 | 0 | 1,000 |
| **LAD+D1** | 1 (1%) | 1 | 0 | 1,000 |
| **RCA** | 79 (40%) | 51 | 28 | **0,001** |
| **RCX+RCA** | 6 (3%) | 4 | 2 | 0,678 |
| **PD** | 1 (1%) | 0 | 1 | 1,000 |
| **RIA+RCX+RCA** | 3 (2%) | 1 | 2 | 1,000 |
| **RCX** | 8 (4%) | 4 | 4 | 1,000 |
| **D1** | 3 (2%) | 1 | 2 | 1,000 |
| **RCA+RPL** | 3 (2%) | 1 | 2 | 1,000 |
| **OM1** | 5 (3%) | 1 | 4 | 0,365 |
| **OM2** | 4 (2%) | 1 | 3 | 0,614 |
| **OM1+RCA** | 1 (1%) | 0 | 1 | 1,000 |
| **OM2+RCA** | 1 (1%) | 0 | 1 | 1,000 |
| **Compromised collateral vessel** | 24 (12%) | 15 | 9 | 0,277 |
| **Kissing technique** |  |  |  |  |
| **No** | 184 (92%) | 92 | 92 | 1,000 |
| **PTCA-PTCA** | 15 (8%) | 7 | 8 | 1,000 |
| **ST-ST** | 1 (1%) | 1 | 0 | 1,000 |
| **Bifurcation technique** | 1 (1%) | 1 | 0 | 1,000 |
| **Additional work-up** |  |  |  |  |
| **No** | 15 (8%) | 72 | 81 | 0,182 |
| **PCI during the same hospitalization** | 184 (92%) | 14 | 11 | 0,669 |
| **PCI during the other hospitalization** | 1 (1%) | 11 | 7 | 0,459 |
| **CABG during the other hospitalization** | 1 (1%) | 3 | 1 | 0,614 |
| **Number of implanted stents** | 1,4 | 1.0 [1.0 - 2.0] | 1.0 [1.0 - 2.0] | 0,105 |
| **Total stent length (mm)** | 30,1 | 25.5 [18.0 - 35.25] | 26.0 [20.0 - 40.25] | 0,067 |
| **Information about the stented artery:** |  |  |  |  |
| **Stent length (mm)** | 22,6 | 21.0 [18.0 - 26.0] | 23.0 [18.0 - 28.0] | 0,055 |
| **Stent diameter** | 3,1 | 3.0 [3.0 - 3.5] | 3.0 [3.0 - 3.5] | 0,559 |
| **Atmosphere** | 13,3 | 12.0 [12.0 - 16.0] | 14.0 [12.0 - 15.0] | 0,604 |
| **Type of the stent** |  |  |  | **0,010** |
| **Bare-metal stent** | 111 (56%) | 65 | 46 |  |
| **Drug-eluted stent** | 89 (45%) | 35 | 54 |  |
| **Stented coronary artery** |  |  |  |  |
| **RCA** | 97 (49%) | 63 | 34 | **0,000** |
| **LAD** | 75 (38%) | 28 | 47 | **0,009** |
| **D1** | 3 (2%) | 1 | 2 | 1,000 |
| **PD** | 2 (1%) | 0 | 2 | 0,477 |
| **OM1** | 6 (3%) | 1 | 5 | 0,214 |
| **RCX** | 10 (5%) | 6 | 4 | 0,746 |
| **OM2** | 4 (2%) | 1 | 3 | 0,614 |
| **RIM** | 2 (1%) | 0 | 2 | 0,477 |
| **RPL** | 1 (1%) | 0 | 1 | 1,000 |
| **Patients with optimal outcome** | 200 (100%) | 100 | 100 | 1,000 |
| **Complications** |  |  |  |  |
| **Without** | 193 (97%) | 98 | 95 | 0,442 |
| **Coronary artery dissection** | 6 (3%) | 2 | 4 | 0,678 |
| **Death in a catheterization laboratory** | 1 (1%) | 0 | 1 | 1,000 |
| **Pre-PCI TIMI flow** |  |  |  |  |
| **0** | 166 (83%) | 84 | 82 | 0,851 |
| **0/1** | 3 (2%) | 1 | 2 | 1,000 |
| **1** | 6 (3%) | 4 | 2 | 0,678 |
| **1/2** | 2 (1%) | 1 | 1 | 1,000 |
| **2** | 13 (7%) | 6 | 7 | 1,000 |
| **2/3** | 4 (2%) | 2 | 2 | 1,000 |
| **3** | 6 (3%) | 2 | 4 | 0,678 |
| **Post-PCI TIMI flow** |  |  |  |  |
| **0** | 1 (1%) | 1 | 0 | 1,000 |
| **1** | 1 (1%) | 1 | 0 | 1,000 |
| **1/2** | 3 (2%) | 0 | 3 | 0,245 |
| **2** | 46 (23%) | 19 | 27 | 0,240 |
| **2/3** | 10 (5%) | 5 | 5 | 1,000 |
| **3** | 139 (70%) | 74 | 65 | 0,219 |
| **TIMI MPG** |  |  |  |  |
| **4** | 127 (64%) | 64 | 63 | 1,000 |
| **3** | 59 (30%) | 28 | 31 | 0,756 |
| **2** | 9 (5%) | 6 | 3 | 0,495 |
| **1** | 5 (3%) | 2 | 3 | 1,000 |
| **GP IIB/IIIa** | 75 (38%) | 40 | 35 | 0,559 |
| **Fibrinolysis due to no reflow** | 1 (1%) | 1 | 0 | 1,000 |

PCI, Percutaneous Coronary Intervention; CABG, Coronary Artery Bypass Grafting; LAD, Left Anterior Descending artery; RCA, Right Coronary Artery; RCX, Circumflex Artery; OM1, First Obtuse Marginal artery; OM2, Second Obtuse Marginal artery; D1, First Diagonal artery; RIM, Ramus Intermedius artery; RIA, Right Interventricular Artery; PD, postero descending; RPL – ramus postero lateralis; PTCA, Percutaneous Transluminal Coronary Angioplasty; TIMI, Thrombolysis In Myocardial Infarction; MPG, Myocardial Perfusion Grade; GP, glycoprotein;

**Table S2.** Additional 6-month follow-up data

| **Variables** | **Whole sample (N = 200)** | **Symptoms duration of less than 6 hours (N = 100)** | **Symptoms duration of more than 6 hours (N = 100)** | **P value** |
| --- | --- | --- | --- | --- |
| **Ischemia assessment** |  |  |  |  |
| **Wasn't performed** | 124 (62%) | 53 | 71 | **0,013** |
| **Positive ergometric test** | 2 (1%) | 0 | 2 | 0,477 |
| **Negative ergometric test** | 60 (30%) | 41 | 19 | **0,001** |
| **Positive stress echocardiography** | 2 (1%) | 1 | 1 | 1,000 |
| **Negative stress exhocardiography** | 10 (5%) | 5 | 5 | 1,000 |
| **Positive SPECT** | 1 (1%) | 0 | 1 | 1,000 |
| **Negative SPECT** | 1 (1%) | 0 | 1 | 1,000 |
| **6-months reintervention due to possible ischemia** | 7 (4%) | 3 | 4 | 1,000 |
| **Atrial Fibrillation** |  |  |  |  |
| **Without** | 176 (88%) | 88 | 88 | 1,000 |
| **New onset (transitory) during hospitalization** | 16 (8%) | 9 | 7 | 0,794 |
| **New onset (permanent) during hospitalization** | 4 (2%) | 1 | 3 | 0,614 |
| **New onset (permanent) during the follow-up** | 1 (1%) | 1 | 0 | 1,000 |
| **Permanent** | 3 (2%) | 1 | 2 | 1,000 |

SPECT, Single Photon Emission Computed Tomography
